# Supplementary material for: WORLDWIDE CASE FATALITY RATIO OF COVID-19 OVER TIME
Source: bioRxiv or medRxiv preprint supplement (doi:10.1101/2020.10.04.20206599), 2020-10-06
Supplement: Supplementary file [file media-3.pdf]

**Supplementary Table 9: Weighted multiple linear regression analysis with 10 country level indicators of health, human development, economic development, and population demographics. Two indicators (Infant mortality rate and smoking % per population were eliminated in colinearity analysis. Resulting model was evaluated with 8 indicators.**

**Model Summary**

| Model | R                 | R Square | Adjusted R Square | Std. Error of the Estimate | Change Statistics |          |     |     |               |
|-------|-------------------|----------|-------------------|----------------------------|-------------------|----------|-----|-----|---------------|
|       |                   |          |                   |                            | R Square Change   | F Change | df1 | df2 | Sig. F Change |
| 1     | .678 <sup>a</sup> | .460     | .428              | 37.35877                   | .460              | 14.470   | 8   | 136 | .000          |

a. Predictors: (Constant), Median Age, Population Density / sqkm, % Mortality from CVD, cancer, diabetes or CRD (Age 30 - 70 ), Hospital Beds / 1K, MMR / 100K live births, GDP / Capita, Physicians / 1k, ASR Mortality air pollution / 100K

**ANOVA<sup>a,b</sup>**

| Model |            | Sum of Squares | df  | Mean Square | F      | Sig.              |
|-------|------------|----------------|-----|-------------|--------|-------------------|
| 1     | Regression | 161558.766     | 8   | 20194.846   | 14.470 | .000 <sup>c</sup> |
|       | Residual   | 189812.174     | 136 | 1395.678    |        |                   |
|       | Total      | 351370.939     | 144 |             |        |                   |

a. Dependent Variable: CFR

b. Weighted Least Squares Regression - Weighted by Inv\_Sesq

c. Predictors: (Constant), Median Age, Population Density / sqkm, % Mortality from CVD, cancer, diabetes or CRD (Age 30 - 70 ), Hospital Beds / 1K, MMR / 100K live births, GDP / Capita, Physicians / 1k, ASR Mortality air pollution / 100K

# **Coefficients<sup>a,b</sup>**

| Model                                                        | Unstandardized Coefficients |            | Standardized Coefficients | t      | Sig. | 95.0% Confidence Interval for B |             | Collinearity Statistics |       |
|--------------------------------------------------------------|-----------------------------|------------|---------------------------|--------|------|---------------------------------|-------------|-------------------------|-------|
|                                                              | B                           | Std. Error | Beta                      |        |      | Lower Bound                     | Upper Bound | Tolerance               | VIF   |
| 1 (Constant)                                                 | -1.219                      | 1.277      |                           | -.955  | .341 | -3.744                          | 1.305       |                         |       |
| GDP / Capita                                                 | -2.712E-005                 | .000       | -.483                     | -4.617 | .000 | .000                            | .000        | .363                    | 2.756 |
| MMR / 100K live births                                       | .007                        | .002       | .431                      | 3.993  | .000 | .004                            | .011        | .341                    | 2.930 |
| Hospital Beds / 1K                                           | -.280                       | .083       | -.372                     | -3.370 | .001 | -.445                           | -.116       | .326                    | 3.070 |
| Physicians / 1k                                              | .224                        | .152       | .168                      | 1.471  | .144 | -.077                           | .524        | .304                    | 3.292 |
| % Mortality from CVD, cancer, diabetes or CRD (Age 30 - 70 ) | -.028                       | .039       | -.096                     | -.714  | .476 | -.106                           | .050        | .220                    | 4.536 |
| ASR Mortality air pollution / 100K                           | -.010                       | .003       | -.487                     | -3.065 | .003 | -.017                           | -.004       | .157                    | 6.357 |
| Population Density / sqkm                                    | .000                        | .000       | -.570                     | -6.572 | .000 | -.001                           | .000        | .528                    | 1.896 |
| Median Age                                                   | .160                        | .037       | .635                      | 4.279  | .000 | .086                            | .234        | .181                    | 5.537 |

a. Dependent Variable: CFR

b. Weighted Least Squares Regression - Weighted by Inv\_Sesq
